# Supplementary material for: Non-Cationic RGD-Containing Protein Nanocarrier for Tumor-Targeted siRNA Delivery
Source: MDPI journal article supplement (doi:10.3390/pharmaceutics13122182), 2021-12-17
Supplement: s1 [file s1]

# Supplementary Materials: Non-Cationic RGD-Containing Protein Nanocarrier for Tumor-Targeted siRNA Delivery

Xiaolin Yu, Lu Xue, Jing Zhao, Shuhua Zhao, Daqing Wu and Hong Yan Liu

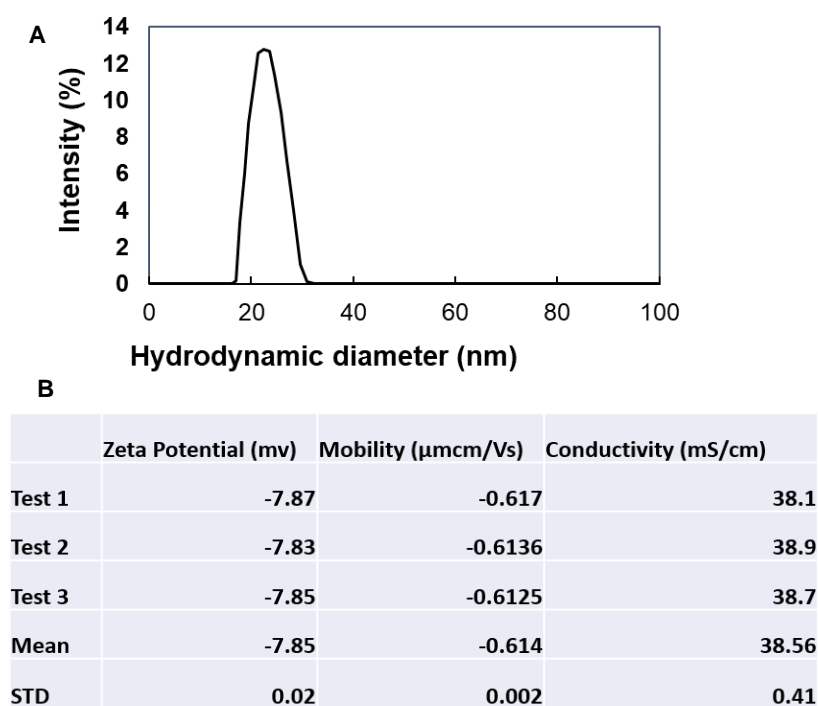

**Figure S1.** Detection of hydrodynamic diameter and zeta potential by Zetasizer. Monomer dual-RGD in PBS buffer were measured at 25°C. The hydro-dynamic diameter is about 23.5nm shown in (A) and zeta potential is about -7.85mv shown in (B).

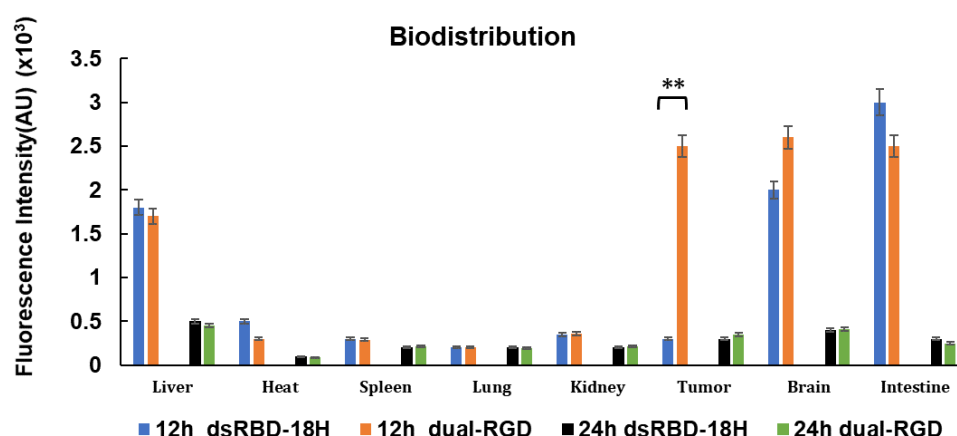

**Figure S2.** Ex vivo evaluation of biodistribution. (A) Athymic mice were injected with MDA-MB-231 cells ( $5 \times 10^6$ ) mixed with Matrigel (v/v 1:1) subcutaneously. After 4 weeks, tumor-bearing mice were tail-vein injected with 100 $\mu\text{l}$  of Cy5-EGFR siRNA/dual-RGD complex (5 nmoles) or equal moles of Cy5-siRNA/dsRBD-18His complex. At time of 12h and 24h, major organs are removed and homogenized in buffer (10mM Tris pH7.4 and 0.5% Triton X-100) with mortar and pestle at a ratio of 100mg of tissue per ml buffer. 100 $\mu\text{l}$  of tissue homogenate was loaded to a 96-well plate. The plate was measured by Tecan Infinite F200 Pro Microplate Reader. The results are the mean  $\pm$  SEM (N=3). \*\*P<0.01.

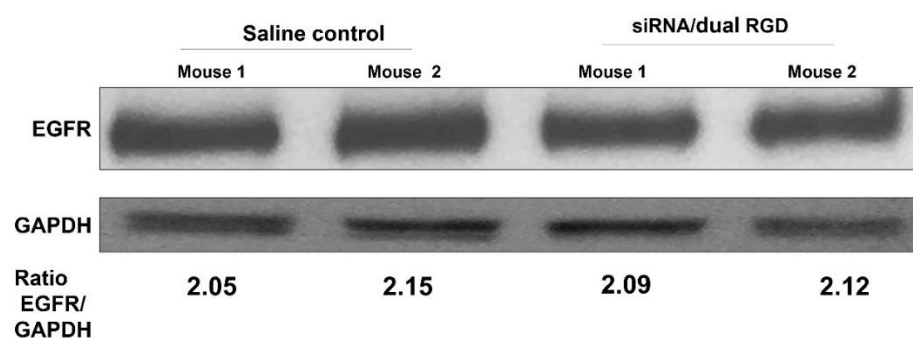

**Figure S3. Evaluation of off-target gene silencing in brain.** After treatment of saline or siRNA/dual RGD ( 5nmles) twice a week for 4 weeks. EGFR silencing in brain tissues was detected by Western blot. There is no significant difference of EGFR expression between saline treated or siRNA/dual RGD treated mouse brains. This result indicates dual-RGD did not induce siRNA endocytosis/gene knockdown in brain.
